# Supplementary material for: Telehealth multicomponent exercise and health education in breast cancer patients undergoing primary treatment: rationale and methodological protocol for a randomized clinical trial (ABRACE: Telehealth)
Source: Springer Nature journal article supplement (doi:10.1186/s13063-022-07015-z), 2023-01-19
Supplement: 13063_2022_7015_MOESM1_ESM.pdf [file 13063_2022_7015_MOESM1_ESM.pdf]

## BOARD - EXERCISES

| MESOCYCLE 1                                                                         |                                                                                     | MESOCYCLE 2                                                                          |                                                                                       |
|-------------------------------------------------------------------------------------|-------------------------------------------------------------------------------------|--------------------------------------------------------------------------------------|---------------------------------------------------------------------------------------|
| PHASE 1                                                                             | PHASE 2                                                                             | PHASE 1                                                                              | PHASE 2                                                                               |
|    |    |    |    |
| Shoulder front raise                                                                |                                                                                     | Shoulder front raise                                                                 |                                                                                       |
|   |   |   |   |
| Stiff                                                                               |                                                                                     | Stiff                                                                                |                                                                                       |
|  |  |  |  |
| Skipping                                                                            |                                                                                     | Adapted jumping jacks                                                                |                                                                                       |
|  |  |  |  |
| Single leg stance (Right leg + Left leg)                                            |                                                                                     | Imaginary line walking                                                               |                                                                                       |

# BOARD - EXERCISES

| MESOCYCLE 1                                                                         |                                                                                     | MESOCYCLE 2                                                                          |                                                                                       |
|-------------------------------------------------------------------------------------|-------------------------------------------------------------------------------------|--------------------------------------------------------------------------------------|---------------------------------------------------------------------------------------|
| PHASE 1                                                                             | PHASE 2                                                                             | PHASE 1                                                                              | PHASE 2                                                                               |
|    |    |    |    |
| Pelvic lift                                                                         |                                                                                     | Unilateral pelvic lift                                                               |                                                                                       |
|   |   |   |   |
| Dumbbell floor press                                                                |                                                                                     | Dumbbell fly                                                                         |                                                                                       |
|  |  |  |  |
| Chair squat                                                                         |                                                                                     | Dynamic plus isometric squat                                                         |                                                                                       |
|  |  |  |  |
| One-arm dumbbell row                                                                |                                                                                     | One arm wide grip dumbbell row                                                       |                                                                                       |

BOARD - EXERCISES

| MESOCYCLE 1                                                                         |                                                                                     | MESOCYCLE 2                                                                          |                                                                                       |
|-------------------------------------------------------------------------------------|-------------------------------------------------------------------------------------|--------------------------------------------------------------------------------------|---------------------------------------------------------------------------------------|
| PHASE 1                                                                             | PHASE 2                                                                             | PHASE 1                                                                              | PHASE 2                                                                               |
|    |    |    |    |
| Split squat (w/ stick support to balance)                                           |                                                                                     | Lunge                                                                                |                                                                                       |
|   |   |   |   |
| Lateral raises                                                                      |                                                                                     | Front raise                                                                          |                                                                                       |
|  |  |  |  |
| Biceps curl                                                                         |                                                                                     | Hammer curl                                                                          |                                                                                       |
|  |  |  |  |
| Lying triceps extension                                                             |                                                                                     | Dynamic plus isometric lying triceps extension                                       |                                                                                       |

## BOARD - EXERCISES

| MESOCYCLE 1                                                                        |                                                                                      | MESOCYCLE 2                                                                        |         |
|------------------------------------------------------------------------------------|--------------------------------------------------------------------------------------|------------------------------------------------------------------------------------|---------|
| PHASE 1                                                                            | PHASE 2                                                                              | PHASE 1                                                                            | PHASE 2 |
|   |     |  |         |
| Crunch                                                                             |                                                                                      | Isometric reverse crunch                                                           |         |
|  |   |                                                                                    |         |
| Isometric crunch                                                                   |  |                                                                                    |         |
|                                                                                    |                                                                                      | Bird dog                                                                           |         |

| MESOCYCLE 3                                                                         |                                                                                      |
|-------------------------------------------------------------------------------------|--------------------------------------------------------------------------------------|
| PHASE 1                                                                             | PHASE 2                                                                              |
| 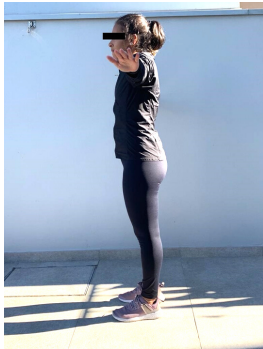 |  |
| Airplane pose (Right leg + Left leg)                                                |                                                                                      |
